# Supplementary material for: Boron–noble gas covalent bonds in borenium and boronium compounds
Source: Royal Society of Chemistry journal article supplement (doi:10.1039/d0cp05177b), 2021-01-01
Supplement: d0cp05177b2.pdf [file d0cp05177b2.pdf]

## Boron – Noble Gas Covalent Bond in Borenium and Boronium compounds

Lily Arrué<sup>a,b</sup> and Ricardo Pino-Rios<sup>c\*</sup>

<sup>a</sup>Doctorado en Físicoquímica Molecular. Facultad de Ciencias Exactas. Universidad Andrés Bello (UNAB). Av. República 275, Santiago, Región Metropolitana, Chile.

<sup>b</sup>Facultad de Ciencias de la Salud, Universidad Autónoma de Chile, Chile.

<sup>c</sup>Laboratorio de Química Teórica, Facultad de Química y Biología. Universidad de Santiago de Chile (USACH) Av. Libertador Bernardo O'Higgins 3363, Santiago, Estación Central, Región Metropolitana, Chile; [ricardo.pino@usach.cl](mailto:ricardo.pino@usach.cl)

### SUPPORTING INFORMATION

**Fig. S1.** Structures for the  $D_{\infty}$  Borenium ( $BH_2Ng^+$ ) compounds and the first local minimum of Boronium cations ( $BH_2Ng_2^+$ ). Ng = He – Rn at the PBE0-D3/def2-TZVP level. Pink spheres represent boron atoms, white hydrogen atoms and turquoise Ng atoms.

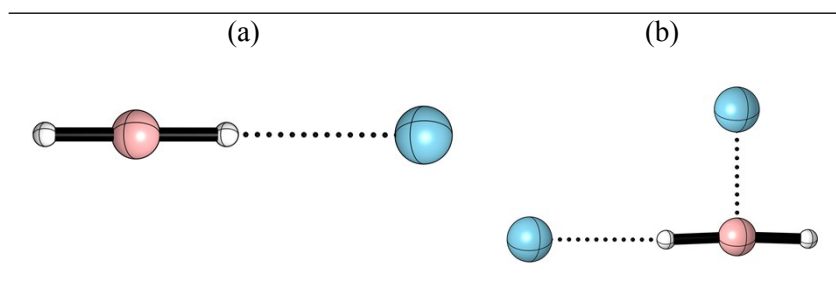

**Table S1.** Relative energies of  $\text{BH}_2\text{Ng}^+$  and  $\text{BH}_2\text{Ng}_2^+$  ( $\text{Ng} = \text{He} - \text{Rn}$ ) with first local minima at corrected PBE0-D3/def2-TZVP, CCSD(T)/def2-TZVP//PBE0-D3/def2-TZVP and uncorrected CCSD(T)/def2-TZVP//PBE0/def2-TZVP levels.

| System                     | $E_{\text{relative,DFT}}$ | $E_{\text{relative,CCSDT uncorrected}}$ | $E_{\text{relative,CCSDT corrected}}$ |
|----------------------------|---------------------------|-----------------------------------------|---------------------------------------|
| $\text{BH}_2\text{He}^+$   | 0.5                       | 0.1                                     | -0.4                                  |
| $\text{BH}_2\text{Ne}^+$   | 1.7                       | 0.8                                     | 0.1                                   |
| $\text{BH}_2\text{Ar}^+$   | 14.3                      | 12.0                                    | 10.5                                  |
| $\text{BH}_2\text{Kr}^+$   | 20.0                      | 17.8                                    | 16.0                                  |
| $\text{BH}_2\text{Xe}^+$   | 28.1                      | 25.8                                    | 24.5                                  |
| $\text{BH}_2\text{Rn}^+$   | 50.7                      | 30.9                                    | 29.1                                  |
| $\text{BH}_2\text{He}_2^+$ | 0.2                       | 0.1                                     | 0.6                                   |
| $\text{BH}_2\text{Ne}_2^+$ | 1.5                       | 1.0                                     | 0.4                                   |
| $\text{BH}_2\text{Ar}_2^+$ | 7.2                       | 12.8                                    | 11.5                                  |
| $\text{BH}_2\text{Kr}_2^+$ | 9.2                       | 7.9                                     | 6.7                                   |
| $\text{BH}_2\text{Xe}_2^+$ | 12.0                      | 10.5                                    | 9.4                                   |
| $\text{BH}_2\text{Rn}_2^+$ | 13.5                      | 13.1                                    | 12.1                                  |

**Table S2.** Geometrical parameters for  $\text{BH}_2^+$ , Ng-Borenium and  $\text{Ng}_2$ -Boronium cations at the PBE0-D3/ef2-TZVP level, and values for the T1 diagnostic for all the systems at the CCSD(T)/def2-TZVP//PBE0-D3/def2-TZVP level.

| System                     | $r_{\text{B-H}}$ | $r_{\text{B-Ng}}$ | $a_{\text{H-B-H}}$ | $a_{\text{Ng-B-Ng}}$ | T1 diag |
|----------------------------|------------------|-------------------|--------------------|----------------------|---------|
| $\text{BH}_2^+$            | 1.18             | -                 | 180.00             | -                    | 0.0060  |
| $\text{BH}_2\text{He}^+$   | 1.18             | 2.11              | 175.89             | -                    | 0.0057  |
| $\text{BH}_2\text{Ne}^+$   | 1.18             | 2.12              | 172.10             | -                    | 0.0082  |
| $\text{BH}_2\text{Ar}^+$   | 1.18             | 2.00              | 148.26             | -                    | 0.0071  |
| $\text{BH}_2\text{Kr}^+$   | 1.18             | 2.11              | 144.81             | -                    | 0.0064  |
| $\text{BH}_2\text{Xe}^+$   | 1.18             | 2.27              | 141.38             | -                    | 0.0074  |
| $\text{BH}_2\text{Rn}^+$   | 1.18             | 2.35              | 140.55             | -                    | 0.0074  |
| $\text{BH}_2\text{He}_2^+$ | 1.18             | 2.06              | 172.87             | 75.44                | 0.0057  |
| $\text{BH}_2\text{Ne}_2^+$ | 1.18             | 2.16              | 169.56             | 83.68                | 0.0084  |
| $\text{BH}_2\text{Ar}_2^+$ | 1.18             | 2.13              | 144.56             | 98.05                | 0.0071  |
| $\text{BH}_2\text{Kr}_2^+$ | 1.18             | 2.25              | 140.80             | 101.49               | 0.0062  |
| $\text{BH}_2\text{Xe}_2^+$ | 1.18             | 2.40              | 136.31             | 105.38               | 0.0070  |
| $\text{BH}_2\text{Rn}_2^+$ | 1.18             | 2.49              | 135.61             | 106.64               | 0.0070  |

**Table S3.** van der Waals radii ( $R_{\text{vdW}}$ ) and covalent radii ( $R_{\text{Cov}}$ ) for B and Ng atoms (in Å) taken from references 81 and 82.

| Atom | $R_{\text{vdW}}$ | $R_{\text{Cov}}$ |
|------|------------------|------------------|
| B    | 2.05             | 0.84             |
| He   | 1.43             | 0.28             |
| Ne   | 1.58             | 0.58             |
| Ar   | 1.94             | 1.06             |
| Kr   | 2.07             | 1.16             |
| Xe   | 2.28             | 1.40             |
| Rn   | 2.40             | 1.50             |

**Table S4.** QTAIM parameters (in a.u.) at B-Ng bond critical points (BCP) at PBE0-D3/def2-TZVP level.

| System                     | $\rho(r_c)$ | $\nabla^2\rho(r_c)$ | $G(r_c)$ | $V(r_c)$ | $H(r_c)$ |
|----------------------------|-------------|---------------------|----------|----------|----------|
| $\text{BH}_2\text{He}^+$   | 0.0164      | 0.0522              | 0.0118   | -0.0105  | 0.0013   |
| $\text{BH}_2\text{Ne}^+$   | 0.0259      | 0.0675              | 0.0190   | -0.0211  | -0.0021  |
| $\text{BH}_2\text{He}_2^+$ | 0.0178      | 0.0545              | 0.0128   | -0.0119  | 0.0009   |
| $\text{BH}_2\text{Ne}_2^+$ | 0.0234      | 0.0659              | 0.0175   | -0.0186  | -0.0010  |

**Fig. S2.** Contour plots of Laplacian of electron density ( $\nabla^2\rho(r_c)$ ) for Boremium  $\text{BH}_2\text{Ng}^+$  cations (Ng = He and Ne) at the PBE0-D3/def2-TZVP level. Blue solid lines represent positive values (Charge depletion), whereas red dashed lines represent negative values (Charge concentration).

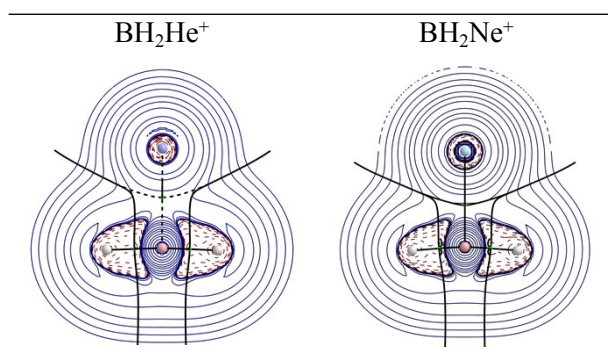

**Table S5.** NPA Charges ( $q$ ) for the B and Ng centers (a.u), Wiberg bond indices for B-Ng (Ng = He and Ne) at the PBE0-D3/def2-TZVP level.

| System                                       | Wiberg | $q_B$ | $q_{Ng}$ |
|----------------------------------------------|--------|-------|----------|
| BH <sub>2</sub> He <sup>+</sup>              | 0.06   | 1.09  | 0.03     |
| BH <sub>2</sub> Ne <sup>+</sup>              | 0.10   | 1.04  | 0.05     |
| BH <sub>2</sub> He <sub>2</sub> <sup>+</sup> | 0.08   | 1.04  | 0.04     |
| BH <sub>2</sub> Ne <sub>2</sub> <sup>+</sup> | 0.09   | 0.98  | 0.05     |

**Fig. S3.** NBO plots of B-Ng (He and Ne) for Borenum (BH<sub>2</sub>N<sub>2</sub><sup>+</sup>) and Boronium cations (BH<sub>2</sub>Ng<sub>2</sub><sup>+</sup>).

At the PBE0-D3/def2-TZVP level.

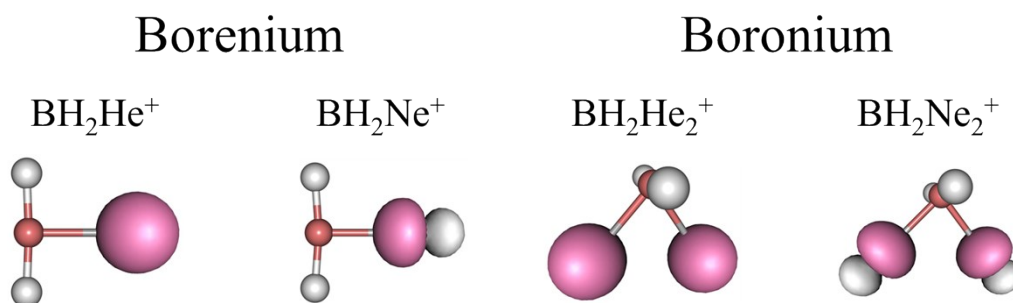

**Table S6.** EDA results for Borenum, BH<sub>2</sub>Ng<sup>+</sup> and Boronium, BH<sub>2</sub>Ng<sub>2</sub><sup>+</sup> (Ng = He an Ne) at the PBE-D3/TZ2P//PBE0-D3/def2-TZVP level.

| System                                       | $\Delta E_{\text{int}}$ | $\Delta E_{\text{Pauli}}$ | $\Delta V_{\text{elstat}}$ | $\Delta E_{\text{orb}}$ | $\Delta E_{\text{disp}}$ | % $\Delta E_{\text{cov}}$ | % $\Delta E_{\text{non-cov}}$ |
|----------------------------------------------|-------------------------|---------------------------|----------------------------|-------------------------|--------------------------|---------------------------|-------------------------------|
| BH <sub>2</sub> He <sup>+</sup>              | -2.12                   | 4.05                      | -0.90                      | -5.07                   | -0.20                    | 82.17                     | 17.83                         |
| BH <sub>2</sub> Ne <sup>+</sup>              | -4.78                   | 9.29                      | -2.85                      | -10.92                  | -0.30                    | 77.61                     | 22.39                         |
| BH <sub>2</sub> He <sub>2</sub> <sup>+</sup> | -4.36                   | 9.36                      | -2.03                      | -11.30                  | -0.39                    | 82.36                     | 17.64                         |
| BH <sub>2</sub> Ne <sub>2</sub> <sup>+</sup> | -8.76                   | 15.92                     | -4.80                      | -19.30                  | -0.59                    | 78.17                     | 21.83                         |
